# Supplementary material for: SUMOylation of DRIL1 Directs Its Transcriptional Activity Towards Leukocyte Lineage-Specific Genes
Source: PubMed Central journal article supplement (PMC2677661; doi:10.1371/journal.pone.0005542), 2009-05-14
Supplement: pone.0005542.s001.pdf [file pone.0005542.s001.pdf]

| Gene ID          | Definition                                                                 | REFSEQ ID             | (-) AVG_signal | wt AVG_signal  | Fold change |
|------------------|----------------------------------------------------------------------------|-----------------------|----------------|----------------|-------------|
| BGN              | biglycan                                                                   | NM_001711.3           | 34.04          | 257.39         | 7.56        |
| GDF15            | growth differentiation factor 15                                           | NM_004864.1           | 41.41          | 258.91         | 6.25        |
| HES5             | hairly and enhancer of split 5                                             | NM_001010926.1        | 60.29          | 319.40         | 5.3         |
| H19              | H19 imprinted maternally expressed untranslated                            | NR_002196.1           | 37.31          | 187.94         | 5.04        |
| MYBPHL           | myosin binding protein H-like                                              | NM_001010985.1        | 38.12          | 181.96         | 4.77        |
| CELP             | carboxyl ester lipase pseudogene                                           | NR_001275.1           | 35.70          | 151.16         | 4.23        |
| CDKN1A           | cyclin-dependent kinase inhibitor 1A                                       | NM_078467.1           | 301.82         | 1223.12        | 4.05        |
| CEL              | carboxyl ester lipase                                                      | NM_001807.2           | 57.66          | 227.88         | 3.95        |
| CRIP2            | cysteine-rich protein 2                                                    | NM_001312.2           | 48.45          | 177.93         | 3.67        |
| GPR56            | G protein-coupled receptor 56                                              | NM_201525.1           | 36.22          | 132.45         | 3.66        |
| ANKRD37          | ankyrin repeat domain 37                                                   | NM_181726.1           | 67.79          | 234.27         | 3.46        |
| FLJ13841         | hypothetical protein LOC79755                                              | NM_024702.1           | 39.05          | 128.17         | 3.28        |
| <b>LY6H</b>      | <b>PREDICTED: lymphocyte antigen 6 complex locus H</b>                     | <b>NM_002347.2</b>    | <b>37.86</b>   | <b>121.04</b>  | <b>3.20</b> |
| GADD45A          | growth arrest and DNA-damage-inducible alpha                               | NM_001924.2           | 231.04         | 738.72         | 3.20        |
| INPP5D           | inositol polyphosphate-5-phosphatase                                       | NM_001017915.1        | 38.01          | 119.34         | 3.14        |
| ACTA2            | actin alpha 2 smooth muscle aorta                                          | NM_001613.1           | 593.66         | 1845.84        | 3.11        |
| CRABP2           | cellular retinoic acid binding protein 2                                   | NM_001878.2           | 139.68         | 429.74         | 3.08        |
| MGC59937         | Similar to RIKEN cDNA 2310002J15 gene                                      | NM_199001.1           | 97.96          | 294.55         | 3.01        |
| <b>HS.554203</b> | <b>clone FP7915 unknown</b>                                                |                       | <b>38.91</b>   | <b>113.49</b>  | <b>2.92</b> |
| ISG20            | interferon stimulated exonuclease gene                                     | NM_002201.4           | 63.58          | 184.71         | 2.90        |
| <b>ITGB2</b>     | <b>integrin beta 2</b>                                                     | <b>NM_000211.2</b>    | <b>46.19</b>   | <b>134.14</b>  | <b>2.90</b> |
| ATF3             | activating transcription factor 3                                          | NM_001040619.1        | 360.23         | 1025.53        | 2.85        |
| H1FO             | H1 histone family member 0                                                 | NM_005318.2           | 1196.86        | 3392.80        | 2.83        |
| <b>LCE1B</b>     | <b>late cornified envelope 1B</b>                                          | <b>NM_178349.1</b>    | <b>35.33</b>   | <b>99.35</b>   | <b>2.81</b> |
| PGF              | placental growth factor vascular endothelial growth factor-related protein | NM_002632.4           | 58.37          | 158.11         | 2.71        |
| G0S2             | G0/G1switch 2                                                              | NM_015714.2           | 40.90          | 109.88         | 2.69        |
| ZNF467           | zinc finger protein 467                                                    | NM_207336.1           | 72.69          | 193.06         | 2.66        |
| RHOB             | ras homolog gene family member B                                           | NM_004040.2           | 425.66         | 1128.44        | 2.65        |
| CDKN1C           | cyclin-dependent kinase inhibitor 1C                                       | NM_000076.1           | 50.49          | 132.44         | 2.62        |
| UNQ2541          | MSFL2541                                                                   | NM_203347.1           | 78.65          | 206.13         | 2.62        |
| APOE             | apolipoprotein E                                                           | NM_000041.2           | 128.49         | 335.78         | 2.61        |
| TP53I3           | tumor protein p53 inducible protein 3                                      | NM_147184.1           | 68.99          | 178.49         | 2.59        |
| LGALS1           | lectin galactoside-binding soluble 1                                       | NM_002305.2           | 120.58         | 310.87         | 2.58        |
| BASP1            | brain abundant membrane attached signal protein 1                          | NM_006317.3           | 527.04         | 1349.91        | 2.56        |
| <b>INHBE</b>     | <b>inhibin beta E</b>                                                      | <b>NM_031479.3</b>    | <b>48.50</b>   | <b>123.90</b>  | <b>2.55</b> |
| P4HA1            | procollagen-proline 2-oxoglutarate 4-dioxygenase (proline 4-hydroxylase)   | NM_000917.2           | 297.79         | 756.36         | 2.54        |
| FEZ1             | fasciculation and elongation protein zeta 1                                | NM_005103.3           | 182.57         | 462.59         | 2.53        |
| IGFBP6           | insulin-like growth factor binding protein 6                               | NM_002178.2           | 51.98          | 128.49         | 2.47        |
| KREMEN2          | kringle containing transmembrane protein 2                                 | NM_024507.2           | 76.75          | 189.36         | 2.47        |
| CD24             | CD24 molecule                                                              | NM_013230.2           | 109.18         | 263.37         | 2.41        |
| BHLHB2           | basic helix-loop-helix domain containing class B 2                         | NM_003670.1           | 412.91         | 985.84         | 2.39        |
| <b>OLFM1</b>     | <b>olfactomedin 1</b>                                                      | <b>NM_014279.2</b>    | <b>54.04</b>   | <b>128.25</b>  | <b>2.37</b> |
| SIRT5            | sirtuin 5                                                                  | NM_012241.2           | 275.10         | 642.98         | 2.34        |
| AXUD1            | AXIN1 up-regulated 1                                                       | NM_033027.2           | 145.94         | 341.06         | 2.35        |
| MGC20983         | hypothetical protein MGC20983                                              | NM_145045.3           | 75.07          | 175.34         | 2.34        |
| TNFRSF12A        | tumor necrosis factor receptor superfamily member 12A                      | NM_016639.1           | 93.83          | 219.11         | 2.34        |
| EEF1A2           | eukaryotic translation elongation factor 1 alpha 2                         | NM_001958.2           | 1262.68        | 2935.02        | 2.32        |
| ADM              | adrenomedullin                                                             | NM_001124.1           | 254.30         | 590.72         | 2.32        |
| TMSL3            | thymosin-like 3                                                            | NM_183049.2           | 1161.71        | 2675.85        | 2.30        |
| <b>CYGB</b>      | <b>cytoglobin</b>                                                          | <b>NM_134268.3</b>    | <b>36.68</b>   | <b>84.22</b>   | <b>2.30</b> |
| CNTRF            | ciliary neurotrophic factor receptor                                       | NM_147164.1           | 136.93         | 312.89         | 2.28        |
| <b>COX11</b>     | <b>COX11 homolog cytochrome c oxidase assembly protein</b>                 | <b>NM_004375.2</b>    | <b>129.18</b>  | <b>292.99</b>  | <b>2.27</b> |
| HIST2H2AA3       | histone cluster 2 H2aa3                                                    | NM_003516.2           | 225.47         | 511.27         | 2.27        |
| VLDLR            | very low density lipoprotein receptor                                      | NM_001018056.1        | 72.09          | 163.05         | 2.26        |
| MT1F             | metallothionein 1F                                                         | NM_005949.1           | 145.40         | 328.83         | 2.26        |
| <b>CRLF1</b>     | <b>cytokine receptor-like factor 1</b>                                     | <b>NM_004750.2</b>    | <b>48.21</b>   | <b>108.67</b>  | <b>2.25</b> |
| <b>HS.537451</b> | <b>AGENCOURT_7971794 NIH_MGC_67 cDNA clone</b>                             |                       | <b>43.69</b>   | <b>98.31</b>   | <b>2.25</b> |
| ARRDC4           | arrestin domain containing 4                                               | NM_183376.1           | 156.19         | 351.42         | 2.25        |
| HBA1             | hemoglobin alpha 1                                                         | NM_000558.3           | 84.73          | 190.23         | 2.25        |
| <b>MDK</b>       | <b>midkine</b>                                                             | <b>NM_001012334.1</b> | <b>2074.27</b> | <b>4653.24</b> | <b>2.24</b> |
| SLC12A4          | solute carrier family 12 (potassium/chloride transporters) member 4        | NM_005072.3           | 57.17          | 127.83         | 2.24        |
| PMAIP1           | phorbol-12-myristate-13-acetate-induced protein 1                          | NM_021127.1           | 228.71         | 511.36         | 2.24        |
| SLC2A3           | solute carrier family 2 (facilitated glucose transporter) member 3         | NM_006931.1           | 158.04         | 352.66         | 2.23        |
| APLP1            | amyloid beta (A4) precursor-like protein 1                                 | NM_005166.3           | 96.47          | 214.53         | 2.22        |
| DRD1IP           | dopamine receptor D1 interacting protein                                   | NM_015722.2           | 128.50         | 285.73         | 2.22        |
| ALOX5            | arachidonate 5-lipoxygenase                                                | NM_000698.2           | 62.10          | 137.84         | 2.22        |
| TXNIP            | thioredoxin interacting protein                                            | NM_006472.1           | 117.04         | 259.32         | 2.22        |
| MGC33212         | hypothetical protein MGC33212                                              | NM_152773.2           | 564.41         | 1248.32        | 2.21        |
| LOC387763        | PREDICTED: hypothetical LOC387763                                          | XM_373497.4           | 178.15         | 392.94         | 2.21        |
| <b>ULBP1</b>     | <b>UL16 binding protein 1</b>                                              | <b>NM_025218.2</b>    | <b>51.36</b>   | <b>113.15</b>  | <b>2.20</b> |
| <b>TCPI10L</b>   | <b>t-complex 10 (mouse)-like</b>                                           | <b>NM_144659.3</b>    | <b>76.53</b>   | <b>167.01</b>  | <b>2.18</b> |
| <b>CIQTNF1</b>   | <b>C1q and tumor necrosis factor related protein 1</b>                     | <b>NM_198594.1</b>    | <b>69.45</b>   | <b>151.05</b>  | <b>2.17</b> |
| S100A10          | S100 calcium binding protein A10                                           | NM_002966.2           | 1999.58        | 4322.00        | 2.16        |
| CAV1             | caveolin 1 caveolae protein                                                | NM_001753.3           | 110.37         | 238.53         | 2.16        |
| <b>C10ORF10</b>  | <b>chromosome 10 open reading frame 10</b>                                 | <b>NM_007021.2</b>    | <b>75.29</b>   | <b>162.30</b>  | <b>2.16</b> |
| <b>EPHA2</b>     | <b>EPH receptor A2</b>                                                     | <b>NM_004431.2</b>    | <b>53.76</b>   | <b>115.84</b>  | <b>2.15</b> |
| RRAS             | related RAS viral (r-ras) oncogene homolog                                 | NM_006270.2           | 114.90         | 247.44         | 2.15        |
| PNCK             | pregnancy upregulated non-ubiquitously expressed CaM kinase                | NM_198452.1           | 148.79         | 320.17         | 2.15        |
| <b>NPY</b>       | <b>neuropeptide Y</b>                                                      | <b>NM_000905.2</b>    | <b>56.67</b>   | <b>121.36</b>  | <b>2.14</b> |
| MYOM2            | myomesin (M-protein) 2                                                     | NM_003970.1           | 93.50          | 199.85         | 2.14        |
| <b>ZNF654</b>    | <b>zinc finger protein 654</b>                                             | <b>NM_018293.2</b>    | <b>80.47</b>   | <b>171.91</b>  | <b>2.14</b> |
| SEMA3F           | sema domain immunoglobulin domain (Ig) short basic domain secreted 3F      | NM_004186.2           | 67.08          | 143.13         | 2.13        |

|                       |                                                                     |                       |               |                |             |
|-----------------------|---------------------------------------------------------------------|-----------------------|---------------|----------------|-------------|
| C11ORF54              | chromosome 11 open reading frame 54                                 | NM_014039.2           | 216.51        | 458.43         | 2.12        |
| TIP39                 | tuberoinsfundibular 39 residue protein                              | NM_178449.2           | 45.56         | 96.42          | 2.12        |
| FBLN1                 | fibulin 1                                                           | NM_006486.2           | 312.72        | 661.20         | 2.11        |
| GPRC5C                | G protein-coupled receptor family C group 5 member C                | NM_018653.3           | 104.74        | 221.32         | 2.11        |
| SNAP91                | synaptosomal-associated protein                                     | NM_014841.1           | 144.19        | 304.14         | 2.11        |
| CHRNA3                | cholinergic receptor nicotinic alpha 3                              | NM_000743.2           | 67.43         | 141.70         | 2.10        |
| ENO2                  | enolase 2                                                           | NM_001975.2           | 159.48        | 334.91         | 2.10        |
| BTG2                  | BTG family member 2                                                 | NM_006763.2           | 113.82        | 239.00         | 2.10        |
| NEFM                  | neurofilament medium polypeptide                                    | NM_005382.1           | 695.61        | 1448.62        | 2.08        |
| <b>LOC644743</b>      | <b>PREDICTED: hypothetical protein LOC644743</b>                    | <b>XM_932346.1</b>    | <b>78.46</b>  | <b>163.00</b>  | <b>2.08</b> |
| <b>CTH</b>            | <b>cystathionase (cystathionine gamma-lyase)</b>                    | <b>NM_153742.3</b>    | <b>135.69</b> | <b>279.11</b>  | <b>2.08</b> |
| CCDC15                | coiled-coil domain containing 15                                    | NM_025004.1           | 93.93         | 193.17         | 2.06        |
| ANTXR2                | anthrax toxin receptor 2                                            | NM_058172.3           | 92.60         | 190.28         | 2.05        |
| <b>SYT11</b>          | <b>synaptotagmin XI</b>                                             | <b>NM_152280.2</b>    | <b>72.73</b>  | <b>148.93</b>  | <b>2.05</b> |
| TJP3                  | tight junction protein 3                                            | NM_014428.1           | 65.61         | 134.12         | 2.04        |
| PRPH                  | peripherin                                                          | NM_006262.3           | 92.91         | 189.07         | 2.04        |
| SPATA18               | spermatogenesis associated 18 homolog                               | NM_145263.1           | 101.25        | 205.95         | 2.03        |
| PPM1M                 | protein phosphatase 1M (PP2C domain containing)                     | NM_144641.1           | 174.11        | 353.27         | 2.03        |
| RDM1                  | RAD52 motif 1                                                       | NM_001034836.1        | 378.90        | 767.51         | 2.03        |
| CRMP1                 | collapsin response mediator protein 1                               | NM_001014809.1        | 126.13        | 255.06         | 2.02        |
| TMEM116               | transmembrane protein 116                                           | NM_138341.1           | 128.82        | 260.47         | 2.02        |
| DUSP1                 | dual specificity phosphatase 1                                      | NM_004417.2           | 306.82        | 618.61         | 2.02        |
| TICAM2                | toll-like receptor adaptor molecule 2                               | NM_021649.3           | 91.80         | 184.52         | 2.01        |
| <b>PPM1D</b>          | <b>protein phosphatase 1D magnesium-dependent delta isoform</b>     | <b>NM_003620.2</b>    | <b>267.37</b> | <b>537.23</b>  | <b>2.01</b> |
| TERF1                 | telomeric repeat binding factor (NIMA-interacting)                  | NM_017489.1           | 266.29        | 533.49         | 2.00        |
| DENND2A               | DENN/MADD domain containing 2A                                      | NM_015689.2           | 69.66         | 139.12         | 2.00        |
| <b>RAD51C</b>         | <b>RAD51 homolog C</b>                                              | <b>NM_058216.1</b>    | <b>657.66</b> | <b>1312.6</b>  | <b>2.00</b> |
| AHNAK                 | AHNAK nucleoprotein                                                 | NM_001620.1           | 134.04        | 266.90         | 1.99        |
| <b>C4ORF34</b>        | <b>chromosome 4 open reading frame 34</b>                           | <b>NM_174921.1</b>    | <b>217.83</b> | <b>432.13</b>  | <b>1.98</b> |
| ZNF423                | zinc finger protein 423                                             | NM_015069.2           | 91.86         | 181.98         | 1.98        |
| <b>NHLH2</b>          | <b>nescent helix loop helix 2</b>                                   | <b>NM_005599.2</b>    | <b>59.97</b>  | <b>118.43</b>  | <b>1.98</b> |
| C1ORF66               | chromosome 1 open reading frame 66                                  | NM_015997.2           | 293.41        | 577.35         | 1.97        |
| HSD17B6               | hydroxysteroid (17-beta) dehydrogenase 6                            | NM_003725.2           | 152.11        | 299.10         | 1.97        |
| CRELD1                | cysteine-rich with EGF-like domains 1                               | NM_001031717.1        | 199.24        | 390.58         | 1.96        |
| <b>SERPINI1</b>       | <b>serpin peptidase inhibitor clade I (neuroserpin) member 1</b>    | <b>NM_005025.2</b>    | <b>82.43</b>  | <b>161.11</b>  | <b>1.95</b> |
| LOC153222             | adult retina protein                                                | NM_153607.1           | 104.7         | 204.21         | 1.95        |
| RPL37                 | ribosomal protein L37                                               | NM_000997.3           | 305.41        | 594.70         | 1.95        |
| S100A11               | S100 calcium binding protein A11                                    | NM_005620.1           | 136.42        | 264.46         | 1.94        |
| C6ORF148              | chromosome 6 open reading frame 148                                 | NM_030568.3           | 76.50         | 147.77         | 1.93        |
| KRCC1                 | lysine-rich coiled-coil 1                                           | NM_016618.1           | 94.37         | 181.32         | 1.92        |
| NPTX2                 | neuronal pentraxin II                                               | NM_002523.1           | 256.91        | 491.70         | 1.91        |
| CACNB3                | calcium channel voltage-dependent beta 3 subunit                    | NM_000725.2           | 156.84        | 299.94         | 1.91        |
| PRDM16                | PR domain containing 16                                             | NM_022114.2           | 81.20         | 155.13         | 1.91        |
| PPP1R13L              | protein phosphatase 1 regulatory (inhibitor) subunit 13 like        | NM_006663.2           | 71.76         | 137.07         | 1.91        |
| YPEL3                 | yippee-like 3                                                       | NM_031477.3           | 160.17        | 304.53         | 1.90        |
| TSPAN5                | tetraspanin 5                                                       | NM_005723.2           | 136.18        | 258.36         | 1.90        |
| DPH5                  | DPH5 homolog (S cerevisiae) (DPH5) transcript variant 3             | NM_001077395.1        | 539.15        | 1020.25        | 1.89        |
| NDRG1                 | N-myc downstream regulated gene 1                                   | NM_006096.2           | 164.76        | 311.41         | 1.89        |
| ZMAT3                 | zinc finger matrin type 3                                           | NM_152240.1           | 214.20        | 404.81         | 1.89        |
| LOC112703             | hypothetical protein BC004941                                       | NM_138411.1           | 260.27        | 491.52         | 1.89        |
| NAV2                  | neuron navigator 2                                                  | NM_145117.3           | 76.81         | 144.67         | 1.89        |
| ASS                   | argininosuccinate synthetase                                        | NM_000050.3           | 812.99        | 1528.94        | 1.88        |
| FAM46C                | family with sequence similarity 46 member C                         | NM_017709.2           | 93.46         | 175.08         | 1.87        |
| <b>TMEM31</b>         | <b>transmembrane protein 31</b>                                     | <b>NM_182541.2</b>    | <b>76.79</b>  | <b>143.78</b>  | <b>1.87</b> |
| <b>RHOC</b>           | <b>ras homolog gene family member C</b>                             | <b>NM_175744.3</b>    | <b>919.28</b> | <b>1717.68</b> | <b>1.87</b> |
| ELP4                  | elongation protein 4                                                | NM_019040.2           | 134.46        | 250.33         | 1.86        |
| <b>OSBPL7</b>         | <b>oxysterol binding protein-like 7</b>                             | <b>NM_145798.2</b>    | <b>83.19</b>  | <b>153.25</b>  | <b>1.84</b> |
| <b>LOC646463</b>      | <b>PREDICTED: similar to Ubiquitin-conjugating enzyme E2 H</b>      | <b>XM_929387.1</b>    | <b>102.61</b> | <b>188.74</b>  | <b>1.84</b> |
| ANKRA2                | ankyrin repeat family A (RFXANK-like) 2                             | NM_023039.2           | 288.48        | 528.93         | 1.83        |
| <b>YPEL5</b>          | <b>yippee-like 5</b>                                                | <b>NM_016061.1</b>    | <b>348.24</b> | <b>637.23</b>  | <b>1.83</b> |
| CCNB1IP1              | cyclin B1 interacting protein 1                                     | NM_182851.1           | 1159.66       | 2120.98        | 1.83        |
| HS_137274             | 602572519F1 NIH_MGC_77 cDNA clone                                   |                       | 123.79        | 226.39         | 1.83        |
| IMMP1L                | IMP1 inner mitochondrial membrane peptidase-like                    | NM_144981.1           | 229.77        | 419.09         | 1.82        |
| <b>DKFZP686K16132</b> | <b>similar to BMP2 inducible kinase</b>                             | <b>NM_001012987.1</b> | <b>109.44</b> | <b>199.52</b>  | <b>1.82</b> |
| <b>EGR1</b>           | <b>early growth response 1</b>                                      | <b>NM_001964.2</b>    | <b>85.66</b>  | <b>155.60</b>  | <b>1.82</b> |
| <b>THAP10</b>         | <b>THAP domain containing 10</b>                                    | <b>NM_020147.2</b>    | <b>219.01</b> | <b>397.79</b>  | <b>1.82</b> |
| FLJ21839              | ATP/GTP binding protein-like 5                                      | NM_021831.5           | 156.05        | 283.38         | 1.82        |
| HERC4                 | hect domain and RLD 4                                               | NM_015601.2           | 210.83        | 381.75         | 1.81        |
| <b>RYBP</b>           | <b>RING1 and YY1 binding protein</b>                                | <b>NM_012234.3</b>    | <b>264.08</b> | <b>473.83</b>  | <b>1.79</b> |
| TMEM54                | transmembrane protein 54                                            | NM_033504.2           | 187.82        | 336.37         | 1.79        |
| SFRS14                | splicing factor arginine/serine-rich 14                             | NM_014884.1           | 547.56        | 979.11         | 1.79        |
| <b>MBNL2</b>          | <b>muscleblind-like 2</b>                                           | <b>NM_207304.1</b>    | <b>197.37</b> | <b>352.93</b>  | <b>1.79</b> |
| <b>XPC</b>            | <b>xeroderma pigmentosum complementation group C</b>                | <b>NM_004628.3</b>    | <b>638.80</b> | <b>1141.58</b> | <b>1.79</b> |
| AGTPBP1               | ATP/GTP binding protein 1                                           | NM_015239.1           | 252.72        | 448.25         | 1.77        |
| C1QL1                 | complement component 1 q subcomponent-like 1                        | NM_006688.3           | 95.87         | 169.99         | 1.77        |
| GARNL4                | GTPase activating Rap/RanGAP domain-like 4                          | NM_015085.3           | 137.01        | 242.13         | 1.77        |
| MGC16169              | hypothetical protein MGC16169                                       | NM_033115.2           | 113.30        | 199.62         | 1.76        |
| ELMOD1                | ELMO/CED-12 domain containing 1                                     | NM_018712.2           | 137.29        | 241.67         | 1.76        |
| LRCH2                 | leucine-rich repeats and calponin homology (CH) domain containing 2 | NM_020871.2           | 363.50        | 639.19         | 1.76        |
| KHDRBS3               | KH domain containing RNA binding signal transduction associated 3   | NM_006558.1           | 718.78        | 1255.37        | 1.75        |
| DDIT4                 | DNA-damage-inducible transcript 4                                   | NM_019058.2           | 2527.63       | 4409.81        | 1.74        |
| ALDOC                 | aldolase C fructose-bisphosphate                                    | NM_005165.2           | 165.59        | 288.72         | 1.74        |
| <b>LIAS</b>           | <b>lipoic acid synthetase</b>                                       | <b>NM_006859.2</b>    | <b>181.02</b> | <b>314.98</b>  | <b>1.74</b> |

|                 |                                                                        |                       |                 |                 |             |
|-----------------|------------------------------------------------------------------------|-----------------------|-----------------|-----------------|-------------|
| <b>CORO2A</b>   | <b>coronin actin binding protein 2A</b>                                | <b>NM_052820.2</b>    | <b>187.5</b>    | <b>326.23</b>   | <b>1.74</b> |
| RBP1            | retinol binding protein 1 cellular                                     | NM_002899.2           | 377.62          | 656.64          | 1.74        |
| MIB2            | mindbomb homolog 2                                                     | NM_080875.1           | 182.37          | 314.86          | 1.73        |
| <b>MGC15476</b> | <b>dapper antagonist of beta-catenin homolog 3</b>                     | <b>NM_145056.1</b>    | <b>129.64</b>   | <b>221.14</b>   | <b>1.71</b> |
| HS.371609       | cDNA clone IMAGE:5261213                                               |                       | 188.47          | 320.69          | 1.71        |
| LOC441763       | PREDICTED: hypothetical LOC441763                                      | XM_930284.1           | 702.19          | 1192.69         | 1.71        |
| C6ORF48         | chromosome 6 open reading frame 48                                     | NM_001040437.1        | 2048.27         | 3460.71         | 1.69        |
| ARHGEF6         | Rac/Cdc42 guanine nucleotide exchange factor (GEF) 6                   | NM_004840.2           | 346.19          | 584.10          | 1.69        |
| ARHGEF2         | rho/rac guanine nucleotide exchange factor (GEF) 2                     | NM_004723.2           | 474.88          | 801.07          | 1.69        |
| <b>FLJ20130</b> | <b>nucleoporin 62kDa C-terminal like</b>                               | <b>NM_017681.1</b>    | <b>478.84</b>   | <b>805.42</b>   | <b>1.68</b> |
| <b>NRIP3</b>    | <b>nuclear receptor interacting protein 3</b>                          | <b>NM_020645.1</b>    | <b>220.87</b>   | <b>370.01</b>   | <b>1.68</b> |
| PPP1R15A        | protein phosphatase 1 regulatory (inhibitor) subunit 15A               | NM_014330.2           | 256.35          | 427.17          | 1.66        |
| PPP3R1          | protein phosphatase 3 (formerly 2B) regulatory subunit B alpha isoform | NM_000945.3           | 379.54          | 627.05          | 1.65        |
| <b>CEBPG</b>    | <b>CCAAT/enhancer binding protein (C/EBP) gamma</b>                    | <b>NM_001806.2</b>    | <b>668.45</b>   | <b>1103.64</b>  | <b>1.65</b> |
| C12ORF57        | chromosome 12 open reading frame 57                                    | NM_138425.2           | 1297.6          | 2115.96         | 1.63        |
| ITPR3           | inositol 145-triphosphate receptor type 3                              | NM_002224.1           | 451.54          | 691.98          | 1.53        |
| <b>CCDC90B</b>  | <b>coiled-coil domain containing 90B (CCDC90B)</b>                     | <b>NM_021825.3</b>    | <b>933.41</b>   | <b>1420.36</b>  | <b>1.52</b> |
| BPNT1           | 3'(2') 5'-bispophosphate nucleotidase 1                                | NM_006085.3           | 421.30          | 616.40          | 1.46        |
| CDC14B          | CDC14 cell division cycle 14 homolog B                                 | NM_003671.2           | 1780.54         | 2453.87         | 1.38        |
| LOC644033       | PREDICTED: similar to similar to RPL23AP7 protein                      | XM_927280.1           | 604.33          | 373.36          | 0.62        |
| DHCR24          | 24-dehydrocholesterol reductase                                        | NM_014762.2           | 402.73          | 244.18          | 0.61        |
| POLR3H          | polymerase (RNA) III (DNA directed) polypeptide H                      | NM_138338.2           | 561.87          | 329.44          | 0.59        |
| <b>CLUAP1</b>   | <b>clusterin associated protein 1</b>                                  | <b>NM_024793.1</b>    | <b>18244.89</b> | <b>10675.79</b> | <b>0.59</b> |
| MCOLN2          | mucolipin 2                                                            | NM_153259.2           | 517.45          | 302.33          | 0.58        |
| RCC1            | regulator of chromosome condensation 1                                 | NM_001269.2           | 253.55          | 146.82          | 0.58        |
| MGST1           | microsomal glutathione S-transferase 1                                 | NM_145792.1           | 220.68          | 125.43          | 0.57        |
| HS.535028       | cDNA: FLJ22720 fis clone HSI14320                                      |                       | 439.36          | 241.80          | 0.55        |
| SLC25A10        | solute carrier family 25 member 10                                     | NM_012140.3           | 381.45          | 205.82          | 0.54        |
| PRPF4B          | PRP4 pre- processing factor 4 homolog B                                | NM_003913.3           | 261.70          | 140.53          | 0.54        |
| ZF              | HCF-binding transcription factor Zhangfei                              | NM_021212.1           | 358.86          | 190.41          | 0.53        |
| <b>CALML4</b>   | <b>calmodulin-like 4</b>                                               | <b>NM_001031733.1</b> | <b>425.23</b>   | <b>221.28</b>   | <b>0.52</b> |
| CIRBP           | cold inducible RNA binding protein                                     | NM_001280.1           | 3591.26         | 1864.55         | 0.52        |
| AK2             | adenylate kinase 2                                                     | NM_013411.3           | 356.21          | 183.94          | 0.52        |
| LOC442578       | similar to Cohesin subunit SA-3                                        | NM_001013739.1        | 813.28          | 419.81          | 0.52        |
| SNORA32         | small nucleolar RNA H/ACA box 32                                       | NR_003032.1           | 169.34          | 87.28           | 0.52        |
| LOC645236       | PREDICTED: similar to similar to RPL23AP7 protein                      | XM_928275.1           | 209.49          | 107.77          | 0.51        |
| <b>DIDO1</b>    | <b>death inducer-obliterator 1</b>                                     | <b>NM_080797.2</b>    | <b>292.32</b>   | <b>146.23</b>   | <b>0.50</b> |
| CLK1            | CDC-like kinase 1                                                      | NM_004071.2           | 201.92          | 99.42           | 0.50        |
| HAGHL           | hydroxyacylglutathione hydrolase-like                                  | NM_207112.1           | 140.01          | 68.44           | 0.49        |
| RNU70           | small nucleolar RNA H/ACA box 70                                       | NR_000011.1           | 786.40          | 378.41          | 0.48        |
| LOC85390        | RNA small nucleolar                                                    | NR_001454.1           | 111.80          | 52.87           | 0.47        |
| NSUN5C          | NOL1/NOP2/Sun domain family member 5C                                  | NM_149379.1           | 316.79          | 147.92          | 0.47        |
| RNU30           | small nucleolar RNA C/D box 30                                         | NR_002561.1           | 145.84          | 67.22           | 0.46        |
| JOSD3           | Josephin domain containing 3                                           | NM_024116.2           | 279.89          | 127.64          | 0.46        |
| C1ORF63         | chromosome 1 open reading frame 63                                     | NM_207035.1           | 290.77          | 130.46          | 0.45        |
| CSTF3           | cleavage stimulation factor 3' pre-RNA subunit 3                       | NM_001033506.1        | 298.22          | 133.26          | 0.45        |
| LOC285176       | PREDICTED: similar to ribosomal protein L10                            | XM_937850.1           | 395.89          | 176.59          | 0.45        |
| MGC16121        | PREDICTED: hypothetical protein MGC16121                               | XM_927600.1           | 260.84          | 104.40          | 0.40        |
| SOX9            | SRY (sex determining region Y)-box 9                                   | NM_000346.2           | 717.36          | 280.22          | 0.39        |
| WDR79           | WD repeat domain 79                                                    | NM_018081.1           | 192.67          | 74.33           | 0.38        |
