# Supplementary material for: SUMOylation of DRIL1 Directs Its Transcriptional Activity Towards Leukocyte Lineage-Specific Genes
Source: PubMed Central journal article supplement (PMC2677661; doi:10.1371/journal.pone.0005542), 2009-05-14
Supplement: pone.0005542.s002.pdf [file pone.0005542.s002.pdf]

| GO ID             | term ID                                                             | log2 (odds ratio) | p-value         |
|-------------------|---------------------------------------------------------------------|-------------------|-----------------|
| GO:0030325        | adrenal gland development                                           | 5.90              | 7.85E-04        |
| GO:0035270        | endocrine system development                                        | 5.90              | 7.85E-04        |
| GO:0006526        | arginine biosynthetic process                                       | 5.38              | 2.17E-03        |
| <b>GO:0006534</b> | <b>cysteine metabolic process</b>                                   | <b>5.38</b>       | <b>2.17E-03</b> |
| <b>GO:0001909</b> | <b>leukocyte mediated cytotoxicity</b>                              | <b>5.38</b>       | <b>1.34E-02</b> |
| <b>GO:0042267</b> | <b>natural killer cell mediated cytotoxicity</b>                    | <b>5.38</b>       | <b>1.34E-02</b> |
| <b>GO:0002228</b> | <b>natural killer cell mediated immunity</b>                        | <b>5.38</b>       | <b>1.34E-02</b> |
| GO:0017183        | peptidyl-diphthamide biosynthetic process from peptidyl-histidine   | 5.38              | 1.34E-02        |
| GO:0017182        | peptidyl-diphthamide metabolic process                              | 5.38              | 1.34E-02        |
| GO:0018202        | peptidyl-histidine modification                                     | 5.38              | 1.34E-02        |
| GO:0042448        | progesterone metabolic process                                      | 5.38              | 1.34E-02        |
| <b>GO:0007159</b> | <b>leukocyte adhesion</b>                                           | <b>5.24</b>       | <b>2.73E-03</b> |
| <b>GO:0045739</b> | <b>positive regulation of DNA repair</b>                            | <b>5.12</b>       | <b>1.82E-02</b> |
| GO:0043603        | cellular amide metabolic process                                    | 5.00              | 3.34E-03        |
| <b>GO:0030593</b> | <b>neutrophil chemotaxis</b>                                        | <b>5.00</b>       | <b>3.34E-03</b> |
| GO:0000050        | urea cycle                                                          | 5.00              | 3.34E-03        |
| GO:0019627        | urea metabolic process                                              | 5.00              | 3.34E-03        |
| GO:0042632        | cholesterol homeostasis                                             | 4.90              | 3.98E-03        |
| GO:0055088        | lipid homeostasis                                                   | 4.90              | 3.98E-03        |
| GO:0055092        | sterol homeostasis                                                  | 4.90              | 3.98E-03        |
| GO:0006707        | cholesterol catabolic process                                       | 4.90              | 2.31E-02        |
| GO:0030301        | cholesterol transport                                               | 4.90              | 2.31E-02        |
| GO:0016127        | sterol catabolic process                                            | 4.90              | 2.31E-02        |
| GO:0015918        | sterol transport                                                    | 4.90              | 2.31E-02        |
| <b>GO:0006706</b> | <b>steroid catabolic process</b>                                    | <b>4.80</b>       | <b>4.72E-03</b> |
| <b>GO:0000097</b> | <b>sulfur amino acid biosynthetic process</b>                       | <b>4.80</b>       | <b>4.72E-03</b> |
| GO:0006525        | arginine metabolic process                                          | 4.70              | 5.73E-03        |
| GO:0008333        | endosome to lysosome transport                                      | 4.70              | 2.77E-02        |
| <b>GO:0006542</b> | <b>glutamine biosynthetic process</b>                               | <b>4.70</b>       | <b>2.77E-02</b> |
| <b>GO:0060326</b> | <b>cell chemotaxis</b>                                              | <b>4.53</b>       | <b>6.84E-03</b> |
| <b>GO:0030595</b> | <b>leukocyte chemotaxis</b>                                         | <b>4.53</b>       | <b>6.84E-03</b> |
| <b>GO:0001906</b> | <b>cell killing</b>                                                 | <b>4.53</b>       | <b>3.15E-02</b> |
| GO:0031498        | chromatin disassembly                                               | 4.53              | 3.15E-02        |
| <b>GO:0006337</b> | <b>nucleosome disassembly</b>                                       | <b>4.53</b>       | <b>3.15E-02</b> |
| <b>GO:0032986</b> | <b>protein-DNA complex disassembly</b>                              | <b>4.53</b>       | <b>3.15E-02</b> |
| <b>GO:0050900</b> | <b>leukocyte migration</b>                                          | <b>4.46</b>       | <b>7.86E-03</b> |
| <b>GO:0015669</b> | <b>gas transport</b>                                                | <b>4.38</b>       | <b>8.80E-03</b> |
| GO:0048732        | gland development                                                   | 4.38              | 8.80E-03        |
| <b>GO:0015671</b> | <b>oxygen transport</b>                                             | <b>4.38</b>       | <b>8.80E-03</b> |
| <b>GO:0006835</b> | <b>dicarboxylic acid transport</b>                                  | <b>4.38</b>       | <b>3.54E-02</b> |
| <b>GO:0030218</b> | <b>erythrocyte differentiation</b>                                  | <b>4.38</b>       | <b>3.54E-02</b> |
| <b>GO:0034101</b> | <b>erythrocyte homeostasis</b>                                      | <b>4.38</b>       | <b>3.54E-02</b> |
| <b>GO:0043433</b> | <b>negative regulation of transcription factor activity</b>         | <b>4.38</b>       | <b>3.54E-02</b> |
| GO:0030516        | regulation of axon extension                                        | 4.38              | 3.54E-02        |
| GO:0033261        | regulation of S phase                                               | 4.38              | 3.54E-02        |
| GO:0007090        | regulation of S phase of mitotic cell cycle                         | 4.38              | 3.54E-02        |
| GO:0006641        | triglyceride metabolic process                                      | 4.38              | 3.54E-02        |
| GO:0009084        | glutamine family amino acid biosynthetic process                    | 4.29              | 2.73E-03        |
| GO:0006884        | cell volume homeostasis                                             | 4.24              | 4.06E-02        |
| GO:0022600        | digestive system process                                            | 4.24              | 4.06E-02        |
| <b>GO:0048872</b> | <b>homeostasis of number of cells</b>                               | <b>4.24</b>       | <b>4.06E-02</b> |
| GO:0048168        | regulation of neuronal synaptic plasticity                          | 4.24              | 4.06E-02        |
| GO:0009070        | serine family amino acid biosynthetic process                       | 4.18              | 1.18E-02        |
| GO:0007212        | dopamine receptor signaling pathway                                 | 4.12              | 4.55E-02        |
| <b>GO:0051100</b> | <b>negative regulation of binding</b>                               | <b>4.12</b>       | <b>4.55E-02</b> |
| <b>GO:0043392</b> | <b>negative regulation of DNA binding</b>                           | <b>4.12</b>       | <b>4.55E-02</b> |
| <b>GO:0051053</b> | <b>negative regulation of DNA metabolic process</b>                 | <b>4.00</b>       | <b>5.04E-02</b> |
| <b>GO:0008156</b> | <b>negative regulation of DNA replication</b>                       | <b>4.00</b>       | <b>5.04E-02</b> |
| <b>GO:0045078</b> | <b>positive regulation of interferon-gamma biosynthetic process</b> | <b>4.00</b>       | <b>5.04E-02</b> |
| <b>GO:0008209</b> | <b>androgen metabolic process</b>                                   | <b>3.90</b>       | <b>5.63E-02</b> |

|                   |                                                                              |             |                 |
|-------------------|------------------------------------------------------------------------------|-------------|-----------------|
| GO:0007041        | lysosomal transport                                                          | 3.90        | 5.63E-02        |
| GO:0007271        | synaptic transmission, cholinergic                                           | 3.90        | 5.63E-02        |
| GO:0007611        | learning or memory                                                           | 3.85        | 1.93E-02        |
| <b>GO:0050730</b> | <b>regulation of peptidyl-tyrosine phosphorylation</b>                       | <b>3.80</b> | <b>2.10E-02</b> |
| GO:0006700        | C21-steroid hormone biosynthetic process                                     | 3.80        | 6.22E-02        |
| GO:0045766        | positive regulation of angiogenesis                                          | 3.80        | 6.22E-02        |
| <b>GO:0006282</b> | <b>regulation of DNA repair</b>                                              | <b>3.80</b> | <b>6.22E-02</b> |
| <b>GO:0009266</b> | <b>response to temperature stimulus</b>                                      | <b>3.80</b> | <b>6.22E-02</b> |
| GO:0008652        | amino acid biosynthetic process                                              | 3.78        | 4.63E-04        |
| <b>GO:0000096</b> | <b>sulfur amino acid metabolic process</b>                                   | <b>3.75</b> | <b>2.26E-02</b> |
| GO:0006171        | cAMP biosynthetic process                                                    | 3.70        | 6.77E-02        |
| GO:0006342        | chromatin silencing                                                          | 3.70        | 6.77E-02        |
| GO:0045814        | negative regulation of gene expression, epigenetic                           | 3.70        | 6.77E-02        |
| <b>GO:0051054</b> | <b>positive regulation of DNA metabolic process</b>                          | <b>3.70</b> | <b>6.77E-02</b> |
| <b>GO:0001932</b> | <b>regulation of protein amino acid phosphorylation</b>                      | <b>3.66</b> | <b>2.48E-02</b> |
| GO:0006639        | acylglycerol metabolic process                                               | 3.62        | 7.26E-02        |
| <b>GO:0043450</b> | <b>alkene biosynthetic process</b>                                           | <b>3.62</b> | <b>7.26E-02</b> |
| GO:0001502        | cartilage condensation                                                       | 3.62        | 7.26E-02        |
| <b>GO:0019370</b> | <b>leukotriene biosynthetic process</b>                                      | <b>3.62</b> | <b>7.26E-02</b> |
| <b>GO:0030101</b> | <b>natural killer cell activation</b>                                        | <b>3.62</b> | <b>7.26E-02</b> |
| GO:0006638        | neutral lipid metabolic process                                              | 3.62        | 7.26E-02        |
| GO:0051262        | protein tetramerization                                                      | 3.62        | 7.26E-02        |
| <b>GO:0045072</b> | <b>regulation of interferon-gamma biosynthetic process</b>                   | <b>3.62</b> | <b>7.26E-02</b> |
| <b>GO:0032649</b> | <b>regulation of interferon-gamma production</b>                             | <b>3.62</b> | <b>7.26E-02</b> |
| GO:0006662        | glycerol ether metabolic process                                             | 3.53        | 7.96E-02        |
| GO:0046486        | glycerolipid metabolic process                                               | 3.53        | 7.96E-02        |
| GO:0048705        | skeletal system morphogenesis                                                | 3.53        | 7.96E-02        |
| GO:0008207        | C21-steroid hormone metabolic process                                        | 3.46        | 8.54E-02        |
| <b>GO:0006775</b> | <b>fat-soluble vitamin metabolic process</b>                                 | <b>3.46</b> | <b>8.54E-02</b> |
| GO:0006379        | mRNA cleavage                                                                | 3.46        | 8.54E-02        |
| <b>GO:0007026</b> | <b>negative regulation of microtubule depolymerization</b>                   | <b>3.46</b> | <b>8.54E-02</b> |
| GO:0050770        | regulation of axonogenesis                                                   | 3.46        | 8.54E-02        |
| <b>GO:0031114</b> | <b>regulation of microtubule depolymerization</b>                            | <b>3.46</b> | <b>8.54E-02</b> |
| <b>GO:0006776</b> | <b>vitamin A metabolic process</b>                                           | <b>3.46</b> | <b>8.54E-02</b> |
| GO:0042446        | hormone biosynthetic process                                                 | 3.38        | 3.54E-02        |
| GO:0007589        | body fluid secretion                                                         | 3.38        | 9.12E-02        |
| GO:0046058        | cAMP metabolic process                                                       | 3.38        | 9.12E-02        |
| <b>GO:0031111</b> | <b>negative regulation of microtubule polymerization or depolymerization</b> | <b>3.38</b> | <b>9.12E-02</b> |
| <b>GO:0007422</b> | <b>peripheral nervous system development</b>                                 | <b>3.38</b> | <b>9.12E-02</b> |
| <b>GO:0031110</b> | <b>regulation of microtubule polymerization or depolymerization</b>          | <b>3.38</b> | <b>9.12E-02</b> |
| <b>GO:0031399</b> | <b>regulation of protein modification process</b>                            | <b>3.31</b> | <b>3.73E-02</b> |
| GO:0006000        | fructose metabolic process                                                   | 3.31        | 9.76E-02        |
| GO:0010769        | regulation of cell morphogenesis involved in differentiation                 | 3.31        | 9.76E-02        |
| GO:0000302        | response to reactive oxygen species                                          | 3.31        | 9.76E-02        |
| GO:0009064        | glutamine family amino acid metabolic process                                | 3.27        | 1.60E-02        |
| GO:0007050        | cell cycle arrest                                                            | 3.23        | 8.09E-04        |
| GO:0009309        | amine biosynthetic process                                                   | 3.23        | 2.73E-03        |
| <b>GO:0044272</b> | <b>sulfur compound biosynthetic process</b>                                  | <b>3.21</b> | <b>4.31E-02</b> |
| <b>GO:0051090</b> | <b>regulation of transcription factor activity</b>                           | <b>3.15</b> | <b>4.66E-02</b> |
| <b>GO:0009069</b> | <b>serine family amino acid metabolic process</b>                            | <b>3.15</b> | <b>4.66E-02</b> |
| <b>GO:0019220</b> | <b>regulation of phosphate metabolic process</b>                             | <b>3.12</b> | <b>4.81E-02</b> |
| <b>GO:0051174</b> | <b>regulation of phosphorus metabolic process</b>                            | <b>3.12</b> | <b>4.81E-02</b> |
| <b>GO:0042325</b> | <b>regulation of phosphorylation</b>                                         | <b>3.12</b> | <b>4.81E-02</b> |
| GO:0007088        | regulation of mitosis                                                        | 3.09        | 5.04E-02        |
| GO:0009887        | organ morphogenesis                                                          | 3.09        | 3.34E-03        |
| GO:0044271        | nitrogen compound biosynthetic process                                       | 3.03        | 3.98E-03        |
| <b>GO:0001525</b> | <b>angiogenesis</b>                                                          | <b>3.02</b> | <b>2.48E-02</b> |
| GO:0008015        | blood circulation                                                            | 2.95        | 2.78E-02        |
| GO:0003013        | circulatory system process                                                   | 2.95        | 2.78E-02        |
| <b>GO:0051101</b> | <b>regulation of DNA binding</b>                                             | <b>2.95</b> | <b>6.22E-02</b> |
| GO:0006869        | lipid transport                                                              | 2.90        | 1.34E-02        |
| <b>GO:0008360</b> | <b>regulation of cell shape</b>                                              | <b>2.90</b> | <b>6.64E-02</b> |

|                   |                                                          |             |                 |
|-------------------|----------------------------------------------------------|-------------|-----------------|
| GO:0006979        | response to oxidative stress                             | 2.88        | 3.15E-02        |
| <b>GO:0001568</b> | <b>blood vessel development</b>                          | <b>2.86</b> | <b>3.15E-02</b> |
| <b>GO:0048514</b> | <b>blood vessel morphogenesis</b>                        | <b>2.86</b> | <b>3.15E-02</b> |
| GO:0034728        | nucleosome organization                                  | 2.86        | 1.42E-02        |
| <b>GO:0007218</b> | <b>neuropeptide signaling pathway</b>                    | <b>2.85</b> | <b>1.47E-02</b> |
| <b>GO:0001944</b> | <b>vasculature development</b>                           | <b>2.83</b> | <b>3.41E-02</b> |
| GO:0006096        | glycolysis                                               | 2.8         | 3.54E-02        |
| GO:0010564        | regulation of cell cycle process                         | 2.77        | 7.76E-02        |
| GO:0043123        | positive regulation of I-kappaB kinase/NF-kappaB cascade | 2.76        | 8.28E-03        |
| <b>GO:0051098</b> | <b>regulation of binding</b>                             | <b>2.73</b> | <b>8.28E-02</b> |
| <b>GO:0006694</b> | <b>steroid biosynthetic process</b>                      | <b>2.69</b> | <b>4.15E-02</b> |
| GO:0043122        | regulation of I-kappaB kinase/NF-kappaB cascade          | 2.69        | 9.35E-03        |
| <b>GO:0051052</b> | <b>regulation of DNA metabolic process</b>               | <b>2.66</b> | <b>9.06E-02</b> |
| <b>GO:0007420</b> | <b>brain development</b>                                 | <b>2.64</b> | <b>9.20E-02</b> |
| <b>GO:0008203</b> | <b>cholesterol metabolic process</b>                     | <b>2.62</b> | <b>4.66E-02</b> |
| <b>GO:0048646</b> | <b>anatomical structure formation</b>                    | <b>2.60</b> | <b>4.78E-02</b> |
| GO:0031497        | chromatin assembly                                       | 2.60        | 4.78E-02        |
| GO:0006334        | nucleosome assembly                                      | 2.60        | 4.78E-02        |
| GO:0006007        | glucose catabolic process                                | 2.59        | 4.86E-02        |
| GO:0006323        | DNA packaging                                            | 2.59        | 2.68E-02        |
| GO:0010740        | positive regulation of protein kinase cascade            | 2.58        | 1.34E-02        |
| <b>GO:0016125</b> | <b>sterol metabolic process</b>                          | <b>2.43</b> | <b>6.48E-02</b> |
| GO:0019320        | hexose catabolic process                                 | 2.42        | 6.64E-02        |
| <b>GO:0046365</b> | <b>monosaccharide catabolic process</b>                  | <b>2.41</b> | <b>6.77E-02</b> |
| GO:0006006        | glucose metabolic process                                | 2.40        | 3.59E-02        |
| GO:0009967        | positive regulation of signal transduction               | 2.38        | 2.24E-02        |
| GO:0010627        | regulation of protein kinase cascade                     | 2.38        | 2.24E-02        |
| <b>GO:0008202</b> | <b>steroid metabolic process</b>                         | <b>2.38</b> | <b>1.17E-02</b> |
| GO:0046164        | alcohol catabolic process                                | 2.37        | 7.22E-02        |
| GO:0006333        | chromatin assembly or disassembly                        | 2.34        | 4.13E-02        |
| GO:0010647        | positive regulation of cell communication                | 2.33        | 2.48E-02        |
| GO:0006915        | apoptosis                                                | 2.32        | 5.28E-05        |
| GO:0012501        | programmed cell death                                    | 2.32        | 5.28E-05        |
| GO:0044275        | cellular carbohydrate catabolic process                  | 2.29        | 8.21E-02        |
| <b>GO:0008544</b> | <b>epidermis development</b>                             | <b>2.26</b> | <b>8.58E-02</b> |
| <b>GO:0007417</b> | <b>central nervous system development</b>                | <b>2.23</b> | <b>5.08E-02</b> |
| GO:0008219        | cell death                                               | 2.21        | 1.27E-04        |
| GO:0016265        | death                                                    | 2.21        | 1.27E-04        |
| GO:0008285        | negative regulation of cell proliferation                | 2.20        | 1.94E-02        |
| <b>GO:0007610</b> | <b>behavior</b>                                          | <b>2.07</b> | <b>2.77E-02</b> |
| <b>GO:0008283</b> | <b>cell proliferation</b>                                | <b>1.98</b> | <b>1.34E-02</b> |
| GO:0019318        | hexose metabolic process                                 | 1.95        | 9.08E-02        |
| GO:0005996        | monosaccharide metabolic process                         | 1.92        | 9.66E-02        |
| <b>GO:0007399</b> | <b>nervous system development</b>                        | <b>1.89</b> | <b>4.29E-02</b> |
| <b>GO:0048513</b> | <b>organ development</b>                                 | <b>1.83</b> | <b>2.73E-03</b> |
| GO:0006281        | DNA repair                                               | 1.82        | 5.04E-02        |
| GO:0006974        | response to DNA damage stimulus                          | 1.80        | 3.54E-02        |
| GO:0006066        | cellular alcohol metabolic process                       | 1.80        | 3.57E-02        |
| GO:0007267        | cell-cell signaling                                      | 1.75        | 4.09E-03        |
| <b>GO:0006520</b> | <b>amino acid metabolic process</b>                      | <b>1.73</b> | <b>9.37E-02</b> |
| GO:0022402        | cell cycle process                                       | 1.70        | 3.54E-02        |
| GO:0034984        | cellular response to DNA damage stimulus                 | 1.69        | 7.25E-02        |
| <b>GO:0042127</b> | <b>regulation of cell proliferation</b>                  | <b>1.67</b> | <b>3.69E-02</b> |
| GO:0033554        | cellular response to stress                              | 1.66        | 5.39E-02        |
| GO:0051716        | cellular response to stimulus                            | 1.65        | 5.48E-02        |
| GO:0048731        | system development                                       | 1.63        | 2.18E-03        |
| <b>GO:0019752</b> | <b>carboxylic acid metabolic process</b>                 | <b>1.57</b> | <b>3.59E-02</b> |
| <b>GO:0006082</b> | <b>organic acid metabolic process</b>                    | <b>1.56</b> | <b>3.71E-02</b> |
| GO:0006950        | response to stress                                       | 1.54        | 8.60E-04        |
| <b>GO:0010646</b> | <b>regulation of cell communication</b>                  | <b>1.48</b> | <b>6.77E-02</b> |
| GO:0030154        | cell differentiation                                     | 1.46        | 3.15E-02        |
| GO:0007049        | cell cycle                                               | 1.45        | 2.48E-02        |

|                   |                                             |             |                 |
|-------------------|---------------------------------------------|-------------|-----------------|
| GO:0009653        | anatomical structure morphogenesis          | 1.45        | 9.79E-02        |
| GO:0048869        | cellular developmental process              | 1.37        | 4.29E-02        |
| <b>GO:0048856</b> | <b>anatomical structure development</b>     | <b>1.36</b> | <b>9.35E-03</b> |
| <b>GO:0007275</b> | <b>multicellular organismal development</b> | <b>1.29</b> | <b>4.14E-03</b> |
| GO:0050896        | response to stimulus                        | 1.29        | 7.11E-04        |
| GO:0032502        | developmental process                       | 1.22        | 5.14E-04        |
| <b>GO:0006796</b> | <b>phosphate metabolic process</b>          | <b>1.09</b> | <b>8.54E-02</b> |
| <b>GO:0006793</b> | <b>phosphorus metabolic process</b>         | <b>1.09</b> | <b>8.54E-02</b> |
| <b>GO:0032501</b> | <b>multicellular organismal process</b>     | <b>1.02</b> | <b>6.84E-03</b> |
